# Supplementary material for: Matefin/SUN-1 Phosphorylation on Serine 43 Is Mediated by CDK-1 and Required for Its Localization to Centrosomes and Normal Mitosis in C. elegans Embryos
Source: MDPI journal article supplement (doi:10.3390/cells5010008), 2016-02-24
Supplement: s1 [file s1]

# Matefin/SUN-1 Phosphorylation on Serine 43 is Mediated by CDK-1 and Required for Its Localization to Centrosomes and Normal Mitosis in *C. elegans* Embryos

Noam Zuela and Yosef Gruenbaum

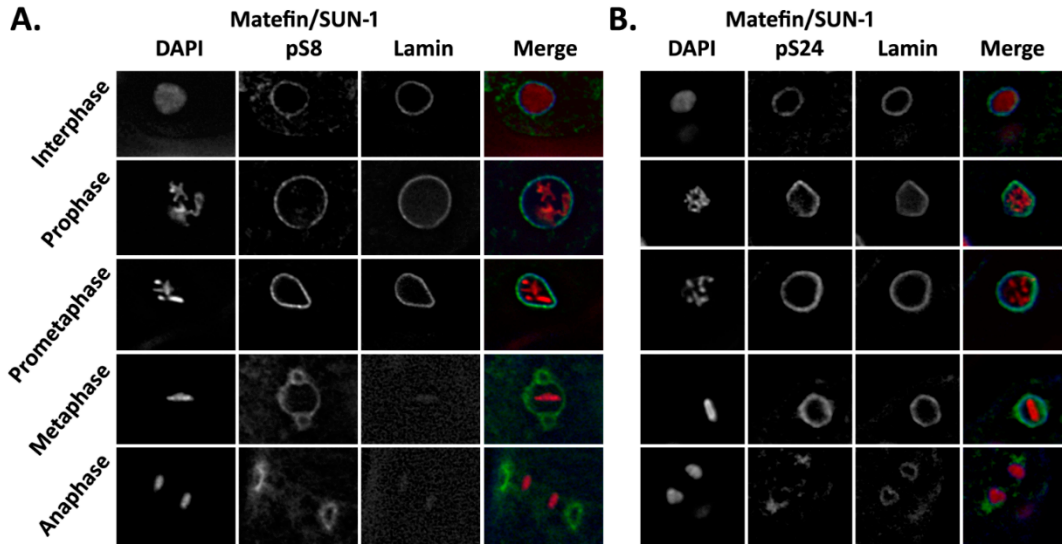

**Figure S1.** Matefin/SUN-1 pS8 and pS24 localization during cell cycle. (A) Matefin/SUN-1 pS8 and (B) Matefin/SUN-1 pS24 localization during different stages of cell cycle. Embryos stained with DAPI (red), anti ce-lamin (blue) and anti matefin/SUN-1pS8/24 (green) antibodies. Scale bar 10  $\mu$ m.

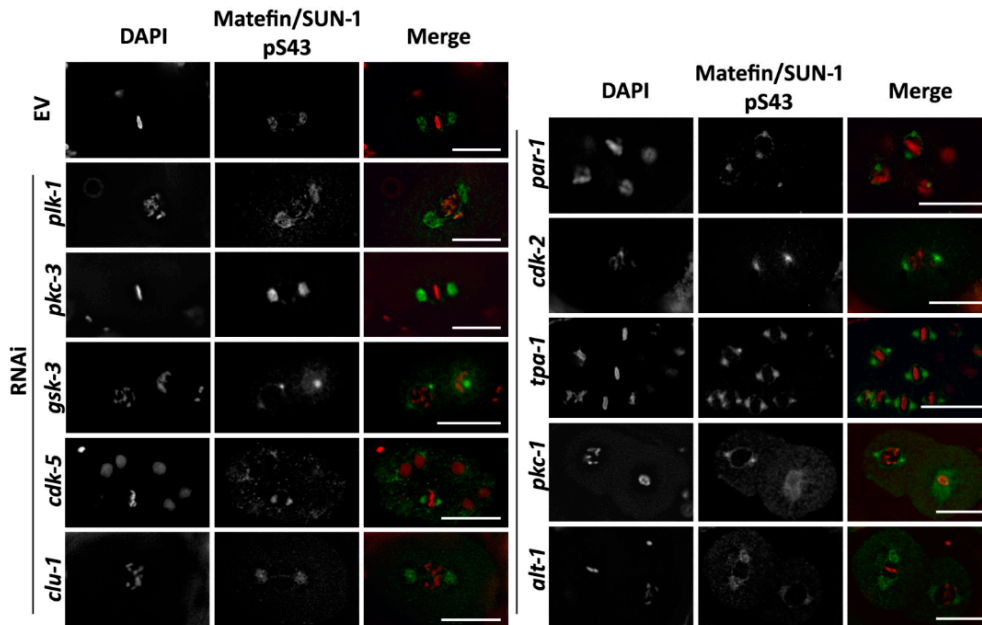

**Figure S2.** RNAi screen of potential kinases involved in matefin/SUN-1 S43 phosphorylation. *C. elegans* early embryos were subjected to RNAi treatment against different kinases and stained with DAPI (red) and anti matefin/SUN-1pS43 antibodies (green). Top left panel: Embryos treated with EV; Bottom left panels and right panels: Embryos treated with RNAi of different kinase genes (*plk-1*, *pkc-3*, *gsk-3*, *cdk-5*, *clu-1*, *par-1*, *cdk-2*, *tpa-1*, *pkc-1* and *alt-1*). No effect on pS43 staining was detected. Scale bar 10  $\mu$ m.
